# Supplementary material for: Predicting Pancreatic Cancer Resectability and Outcomes Based on an Objective Quantitative Scoring System
Source: PubMed Central journal article supplement — Pancreas. 2019 May 10;48(5):622–8. doi: 10.1097/MPA.0000000000001314 (PMC6553971; doi:10.1097/mpa.0000000000001314), 2019-05-10
Supplement: mpa-48-622-s001.pdf [file mpa-48-622-s001.pdf]

# Predicting Pancreatic Cancer Resectability and Outcomes Based on an Objective Quantitative Scoring System

## SUPPLEMENTAL DIGITAL CONTENT

**SUPPLEMENTAL TABLE 1.** Frequencies of Peripancreatic Vessels Involved by Tumor by Resection Status

| <b>Vessel(s) involved</b> | <b>Total, n</b> | <b>Not Resected</b> | <b>Resected</b> | <b>R0 Resected</b> |
|---------------------------|-----------------|---------------------|-----------------|--------------------|
| None                      | 45              | 1 (2)               | 44 (98)         | 34 (75)            |
| Only SMA                  | 8               | 7 (88)              | 1 (12)          | 1 (12)             |
| Only CA/CHA               | 1               | 1 (100)             | 0 (0)           | 0 (0)              |
| Only SMV/PV               | 66              | 19 (29)             | 47 (71)         | 29 (44)            |
| SMA + CA/CHA              | 0               | 0 (0)               | 0 (0)           | 0 (0)              |
| SMA + SMV/PV              | 64              | 45 (70)             | 19 (30)         | 4 (6)              |
| CA/CHA + SMV/PV           | 41              | 39 (95)             | 2 (5)           | 1 (2)              |
| SMA + CA/CHA + SMV/PV     | 69              | 69 (100)            | 0 (0)           | 0 (0)              |

Data expressed as n (%) unless otherwise indicated.  
 SMA indicates superior mesenteric artery; CA, celiac axis; CHA, common hepatic artery; SMV, superior mesenteric vein; PV, portal vein; and R0, microscopic negative surgical margins.

**SUPPLEMENTAL TABLE 2.** Measurements of Circumferential Degree and Length of Tumor Contact With Peripancreatic Vessels

| <b>Vessel Involved</b> | <b>Not Resected<br/>n = 181</b> | <b>Resected<br/>n = 113</b> | <b>R0 Resected<br/>n = 71</b> | <b>Vein Reconstruction<br/>n = 35</b> |
|------------------------|---------------------------------|-----------------------------|-------------------------------|---------------------------------------|
| SMA, n (%)             | 121 (66.8)                      | 20 (17.7)                   | 6 (8.4)                       | 7 (20.0)                              |
| Degree, °              | 360 (20–360)/(180–360)          | 90 (30–360)/(75–120)        | 90 (30–360)/(70–180)          | 120 (30–36)/(40–140)                  |
| Length, cm             | 3.6 (0.8–8.3)/(2.5–4.6)         | 1.2 (0.4–4.8)/(0.9–2.0)     | 1.5 (0.4–2.8)/(0.8–2.2)       | 1.4 (0.9–2.8)/(1.1–2.0)               |
| CA/CHA, n (%)          | 108 (59.7)                      | 2 (1.8)                     | 1 (1.4)                       | 0 (0.0)                               |
| Degree, °              | 360 (60–360)/(360–360)          | 270 (180–360)/(∅)           | 360 (360–360)/(∅)             | 0 (0–0)/(∅)                           |
| Length, cm             | 3.4 (1.0–8.2)/(2.3–4.5)         | 3.0* (2.0–4.0)/(∅)          | 4 (4–4)/(∅)                   | 0 (0–0)/(∅)                           |
| SMV/PV, n (%)          | 172 (95.0)                      | 68 (60.2)                   | 35 (49.3)                     | 31 (88.6)                             |
| Degree, °              | 360 (15–360)/(120–360)          | 110 (30–360)/(90–145)       | 100 (30–360)/(90–140)         | 120 (70–360)/(90–145)                 |
| Length, cm             | 3.9 (0.5–10.9)/(3.0–4.8)        | 2.6 (0.6–7.0)/(1.8–4.0)     | 2.5 (0.6–6.5)/(1.6–3.6)       | 2.9 (0.6–7.0)/(1.9–4.2)               |

Data presented as median (range)/(interquartile range) unless otherwise indicated.

\*Mean value.

∅ indicates non-existent range; SMA, superior mesenteric artery; CA, celiac axis; CHA, common hepatic artery; SMV, superior mesenteric vein; PV, portal vein; and R0, microscopic negative margins.

**SUPPLEMENTAL TABLE 3.** Multivariable Logistic Regression Models for Tumor Resectability Prediction

| <b>Predictors</b>   | <b>Chi-square</b> | <b>OR (95% CI)</b>  | <b>P</b> |
|---------------------|-------------------|---------------------|----------|
| Model 1 - Intercept | 45.9794           | –                   | <0.001   |
| SMA degree          | 6.2630            | 0.988 (0.979–0.997) | 0.012    |
| SMA length          | 0.2971            | 0.833 (0.431–1.608) | 0.58     |
| CA/CHA degree       | 3.4063            | 0.986 (0.972–1.001) | 0.065    |
| CA/CHA length       | 0.0542            | 0.846 (0.208–3.444) | 0.81     |
| Model 2 - Intercept | 46.5973           | –                   | <0.001   |
| SMA degree          | 38.1008           | 0.986 (0.981–0.990) | <0.001   |
| CA/CHA degree       | 26.9826           | 0.985 (0.979–0.991) | <0.001   |
| Model 3 - Intercept | 29.5519           | –                   | <0.001   |
| SMV/PV degree       | 25.2576           | 0.991 (0.988–0.995) | <0.001   |
| SMV/PV length       | 3.2377            | 0.821 (0.662–1.018) | 0.072    |
| Model 4 - Intercept | 41.8615           | –                   | <0.001   |
| SMA degree          | 32.3964           | 0.986 (0.981–0.991) | <0.001   |
| CA/CHA degree       | 23.2130           | 0.987 (0.982–0.992) | <0.001   |
| SMV/PV degree       | 4.3631            | 0.995 (0.990–1.000) | 0.037    |
| SMV/PV length       | 3.5925            | 0.747 (0.553–1.010) | 0.058    |

SMA indicates superior mesenteric artery; CA, celiac axis; CHA, common hepatic artery; SMV, superior mesenteric vein; and PV, portal vein.

**SUPPLEMENTAL TABLE 4.** Different Imaging Scoring Systems for the Quantification of Vessel Involvement by Tumor in Pancreatic Cancer

| Study                              | N          | Vessel                       | Vessel Features                  | Grading/Scoring                                                                                                                                                                                                                                                                                                                                                                                                                                                                                                                                                                                                                                                                                                                                                                                                                                                                                                                                                                                                                                                                                                                                                                          | Sens., % | Spec., %   | PPV, %    | NPV, % |                   |  |   |   |   |  |  |    |      |   |  |  |      |       |   |  |  |       |        |   |  |  |       |         |   |  |  |     |      |   |  |           |            |           |       |                   |  |   |    |   |  |  |    |             |  |  |  |      |                  |   |  |  |       |        |   |  |  |       |         |   |  |  |     |                              |   |  |     |      |    |     |
|------------------------------------|------------|------------------------------|----------------------------------|------------------------------------------------------------------------------------------------------------------------------------------------------------------------------------------------------------------------------------------------------------------------------------------------------------------------------------------------------------------------------------------------------------------------------------------------------------------------------------------------------------------------------------------------------------------------------------------------------------------------------------------------------------------------------------------------------------------------------------------------------------------------------------------------------------------------------------------------------------------------------------------------------------------------------------------------------------------------------------------------------------------------------------------------------------------------------------------------------------------------------------------------------------------------------------------|----------|------------|-----------|--------|-------------------|--|---|---|---|--|--|----|------|---|--|--|------|-------|---|--|--|-------|--------|---|--|--|-------|---------|---|--|--|-----|------|---|--|-----------|------------|-----------|-------|-------------------|--|---|----|---|--|--|----|-------------|--|--|--|------|------------------|---|--|--|-------|--------|---|--|--|-------|---------|---|--|--|-----|------------------------------|---|--|-----|------|----|-----|
| Loyer et al, 1996 <sup>14</sup>    | 56         | NR                           | Degree                           | Type A = Fat plane separates the tumor and/or the normal pancreatic parenchyma from adjacent vessels.<br>Type B = Normal parenchyma separates the hypodense tumor from adjacent vessels.<br>Type C = Hypodense tumor is inseparable from adjacent vessels, and the points of contact form a convexity against the vessels.<br>Type D = Hypodense tumor is inseparable from adjacent vessels, the points of contact form a concavity against the vessels or partially encircle the vessels.<br>Type E = Hypodense tumor encircles adjacent vessels, and no fat plane is identifiable between the tumor and the vessels.<br>Type F = Tumor occludes the vessels.                                                                                                                                                                                                                                                                                                                                                                                                                                                                                                                           | NR       | NR         | NR        | NR     |                   |  |   |   |   |  |  |    |      |   |  |  |      |       |   |  |  |       |        |   |  |  |       |         |   |  |  |     |      |   |  |           |            |           |       |                   |  |   |    |   |  |  |    |             |  |  |  |      |                  |   |  |  |       |        |   |  |  |       |         |   |  |  |     |                              |   |  |     |      |    |     |
| Lu et al, 1997 <sup>15</sup>       | 25         | SMA, CA, CHA, SMV, PV        | Degree                           | 0 = No contiguity of tumor to vessel.<br>1 = Tumor contiguous to less than one-quarter circumference.<br>2 = Between one-quarter and one-half circumference.<br>3 = Between one-half and three-quarters circumference.<br>4 = Greater than three-quarters circumferential involvement or any vessel constriction.                                                                                                                                                                                                                                                                                                                                                                                                                                                                                                                                                                                                                                                                                                                                                                                                                                                                        | 84       | 98         | 95        | 93     |                   |  |   |   |   |  |  |    |      |   |  |  |      |       |   |  |  |       |        |   |  |  |       |         |   |  |  |     |      |   |  |           |            |           |       |                   |  |   |    |   |  |  |    |             |  |  |  |      |                  |   |  |  |       |        |   |  |  |       |         |   |  |  |     |                              |   |  |     |      |    |     |
| Klauss et al, 2008 <sup>16</sup>   | 28         | SMA, CA, SMV, PV, SV         | Degree, length and shape (veins) | <table border="0"> <tr> <td>Veins:</td> <td>Length, mm</td> <td>Degree, °</td> <td>Score</td> <td>Sum (0-18 points)</td> </tr> <tr> <td></td> <td>0</td> <td>0</td> <td>1</td> <td></td> </tr> <tr> <td></td> <td>&lt;5</td> <td>1-45</td> <td>2</td> <td></td> </tr> <tr> <td></td> <td>5-10</td> <td>46-90</td> <td>3</td> <td></td> </tr> <tr> <td></td> <td>11-20</td> <td>91-180</td> <td>4</td> <td></td> </tr> <tr> <td></td> <td>21-40</td> <td>181-270</td> <td>5</td> <td></td> </tr> <tr> <td></td> <td>&gt;40</td> <td>&gt;270</td> <td>6</td> <td></td> </tr> <tr> <td>Arteries:</td> <td>Length, mm</td> <td>Degree, °</td> <td>Score</td> <td>Sum (0-12 points)</td> </tr> <tr> <td></td> <td>0</td> <td>No</td> <td>1</td> <td></td> </tr> <tr> <td></td> <td>&lt;5</td> <td>In Places 2</td> <td></td> <td></td> </tr> <tr> <td></td> <td>5-10</td> <td>Continuously &lt;45</td> <td>3</td> <td></td> </tr> <tr> <td></td> <td>11-20</td> <td>45-180</td> <td>4</td> <td></td> </tr> <tr> <td></td> <td>21-40</td> <td>181-270</td> <td>5</td> <td></td> </tr> <tr> <td></td> <td>&gt;40</td> <td>270 to complete obliteration</td> <td>6</td> <td></td> </tr> </table> | Veins:   | Length, mm | Degree, ° | Score  | Sum (0-18 points) |  | 0 | 0 | 1 |  |  | <5 | 1-45 | 2 |  |  | 5-10 | 46-90 | 3 |  |  | 11-20 | 91-180 | 4 |  |  | 21-40 | 181-270 | 5 |  |  | >40 | >270 | 6 |  | Arteries: | Length, mm | Degree, ° | Score | Sum (0-12 points) |  | 0 | No | 1 |  |  | <5 | In Places 2 |  |  |  | 5-10 | Continuously <45 | 3 |  |  | 11-20 | 45-180 | 4 |  |  | 21-40 | 181-270 | 5 |  |  | >40 | 270 to complete obliteration | 6 |  | 100 | 95.8 | 80 | 100 |
| Veins:                             | Length, mm | Degree, °                    | Score                            | Sum (0-18 points)                                                                                                                                                                                                                                                                                                                                                                                                                                                                                                                                                                                                                                                                                                                                                                                                                                                                                                                                                                                                                                                                                                                                                                        |          |            |           |        |                   |  |   |   |   |  |  |    |      |   |  |  |      |       |   |  |  |       |        |   |  |  |       |         |   |  |  |     |      |   |  |           |            |           |       |                   |  |   |    |   |  |  |    |             |  |  |  |      |                  |   |  |  |       |        |   |  |  |       |         |   |  |  |     |                              |   |  |     |      |    |     |
|                                    | 0          | 0                            | 1                                |                                                                                                                                                                                                                                                                                                                                                                                                                                                                                                                                                                                                                                                                                                                                                                                                                                                                                                                                                                                                                                                                                                                                                                                          |          |            |           |        |                   |  |   |   |   |  |  |    |      |   |  |  |      |       |   |  |  |       |        |   |  |  |       |         |   |  |  |     |      |   |  |           |            |           |       |                   |  |   |    |   |  |  |    |             |  |  |  |      |                  |   |  |  |       |        |   |  |  |       |         |   |  |  |     |                              |   |  |     |      |    |     |
|                                    | <5         | 1-45                         | 2                                |                                                                                                                                                                                                                                                                                                                                                                                                                                                                                                                                                                                                                                                                                                                                                                                                                                                                                                                                                                                                                                                                                                                                                                                          |          |            |           |        |                   |  |   |   |   |  |  |    |      |   |  |  |      |       |   |  |  |       |        |   |  |  |       |         |   |  |  |     |      |   |  |           |            |           |       |                   |  |   |    |   |  |  |    |             |  |  |  |      |                  |   |  |  |       |        |   |  |  |       |         |   |  |  |     |                              |   |  |     |      |    |     |
|                                    | 5-10       | 46-90                        | 3                                |                                                                                                                                                                                                                                                                                                                                                                                                                                                                                                                                                                                                                                                                                                                                                                                                                                                                                                                                                                                                                                                                                                                                                                                          |          |            |           |        |                   |  |   |   |   |  |  |    |      |   |  |  |      |       |   |  |  |       |        |   |  |  |       |         |   |  |  |     |      |   |  |           |            |           |       |                   |  |   |    |   |  |  |    |             |  |  |  |      |                  |   |  |  |       |        |   |  |  |       |         |   |  |  |     |                              |   |  |     |      |    |     |
|                                    | 11-20      | 91-180                       | 4                                |                                                                                                                                                                                                                                                                                                                                                                                                                                                                                                                                                                                                                                                                                                                                                                                                                                                                                                                                                                                                                                                                                                                                                                                          |          |            |           |        |                   |  |   |   |   |  |  |    |      |   |  |  |      |       |   |  |  |       |        |   |  |  |       |         |   |  |  |     |      |   |  |           |            |           |       |                   |  |   |    |   |  |  |    |             |  |  |  |      |                  |   |  |  |       |        |   |  |  |       |         |   |  |  |     |                              |   |  |     |      |    |     |
|                                    | 21-40      | 181-270                      | 5                                |                                                                                                                                                                                                                                                                                                                                                                                                                                                                                                                                                                                                                                                                                                                                                                                                                                                                                                                                                                                                                                                                                                                                                                                          |          |            |           |        |                   |  |   |   |   |  |  |    |      |   |  |  |      |       |   |  |  |       |        |   |  |  |       |         |   |  |  |     |      |   |  |           |            |           |       |                   |  |   |    |   |  |  |    |             |  |  |  |      |                  |   |  |  |       |        |   |  |  |       |         |   |  |  |     |                              |   |  |     |      |    |     |
|                                    | >40        | >270                         | 6                                |                                                                                                                                                                                                                                                                                                                                                                                                                                                                                                                                                                                                                                                                                                                                                                                                                                                                                                                                                                                                                                                                                                                                                                                          |          |            |           |        |                   |  |   |   |   |  |  |    |      |   |  |  |      |       |   |  |  |       |        |   |  |  |       |         |   |  |  |     |      |   |  |           |            |           |       |                   |  |   |    |   |  |  |    |             |  |  |  |      |                  |   |  |  |       |        |   |  |  |       |         |   |  |  |     |                              |   |  |     |      |    |     |
| Arteries:                          | Length, mm | Degree, °                    | Score                            | Sum (0-12 points)                                                                                                                                                                                                                                                                                                                                                                                                                                                                                                                                                                                                                                                                                                                                                                                                                                                                                                                                                                                                                                                                                                                                                                        |          |            |           |        |                   |  |   |   |   |  |  |    |      |   |  |  |      |       |   |  |  |       |        |   |  |  |       |         |   |  |  |     |      |   |  |           |            |           |       |                   |  |   |    |   |  |  |    |             |  |  |  |      |                  |   |  |  |       |        |   |  |  |       |         |   |  |  |     |                              |   |  |     |      |    |     |
|                                    | 0          | No                           | 1                                |                                                                                                                                                                                                                                                                                                                                                                                                                                                                                                                                                                                                                                                                                                                                                                                                                                                                                                                                                                                                                                                                                                                                                                                          |          |            |           |        |                   |  |   |   |   |  |  |    |      |   |  |  |      |       |   |  |  |       |        |   |  |  |       |         |   |  |  |     |      |   |  |           |            |           |       |                   |  |   |    |   |  |  |    |             |  |  |  |      |                  |   |  |  |       |        |   |  |  |       |         |   |  |  |     |                              |   |  |     |      |    |     |
|                                    | <5         | In Places 2                  |                                  |                                                                                                                                                                                                                                                                                                                                                                                                                                                                                                                                                                                                                                                                                                                                                                                                                                                                                                                                                                                                                                                                                                                                                                                          |          |            |           |        |                   |  |   |   |   |  |  |    |      |   |  |  |      |       |   |  |  |       |        |   |  |  |       |         |   |  |  |     |      |   |  |           |            |           |       |                   |  |   |    |   |  |  |    |             |  |  |  |      |                  |   |  |  |       |        |   |  |  |       |         |   |  |  |     |                              |   |  |     |      |    |     |
|                                    | 5-10       | Continuously <45             | 3                                |                                                                                                                                                                                                                                                                                                                                                                                                                                                                                                                                                                                                                                                                                                                                                                                                                                                                                                                                                                                                                                                                                                                                                                                          |          |            |           |        |                   |  |   |   |   |  |  |    |      |   |  |  |      |       |   |  |  |       |        |   |  |  |       |         |   |  |  |     |      |   |  |           |            |           |       |                   |  |   |    |   |  |  |    |             |  |  |  |      |                  |   |  |  |       |        |   |  |  |       |         |   |  |  |     |                              |   |  |     |      |    |     |
|                                    | 11-20      | 45-180                       | 4                                |                                                                                                                                                                                                                                                                                                                                                                                                                                                                                                                                                                                                                                                                                                                                                                                                                                                                                                                                                                                                                                                                                                                                                                                          |          |            |           |        |                   |  |   |   |   |  |  |    |      |   |  |  |      |       |   |  |  |       |        |   |  |  |       |         |   |  |  |     |      |   |  |           |            |           |       |                   |  |   |    |   |  |  |    |             |  |  |  |      |                  |   |  |  |       |        |   |  |  |       |         |   |  |  |     |                              |   |  |     |      |    |     |
|                                    | 21-40      | 181-270                      | 5                                |                                                                                                                                                                                                                                                                                                                                                                                                                                                                                                                                                                                                                                                                                                                                                                                                                                                                                                                                                                                                                                                                                                                                                                                          |          |            |           |        |                   |  |   |   |   |  |  |    |      |   |  |  |      |       |   |  |  |       |        |   |  |  |       |         |   |  |  |     |      |   |  |           |            |           |       |                   |  |   |    |   |  |  |    |             |  |  |  |      |                  |   |  |  |       |        |   |  |  |       |         |   |  |  |     |                              |   |  |     |      |    |     |
|                                    | >40        | 270 to complete obliteration | 6                                |                                                                                                                                                                                                                                                                                                                                                                                                                                                                                                                                                                                                                                                                                                                                                                                                                                                                                                                                                                                                                                                                                                                                                                                          |          |            |           |        |                   |  |   |   |   |  |  |    |      |   |  |  |      |       |   |  |  |       |        |   |  |  |       |         |   |  |  |     |      |   |  |           |            |           |       |                   |  |   |    |   |  |  |    |             |  |  |  |      |                  |   |  |  |       |        |   |  |  |       |         |   |  |  |     |                              |   |  |     |      |    |     |
| Tran Cao et al, 2014 <sup>18</sup> | 254        | SMV, PV                      | Degree                           | Obs: Veins receive additional points based on vessel deformity: Flattened = 4 points; long-segment contour deformity = 5 points; obliteration or severe contour deformity = 6 points.<br>- No direct interface, with either normal pancreas or fat separating the primary tumor from the vessel.<br>- ≤180° of the vessel circumference.<br>- >180° of the vessel circumference.<br>- Vascular occlusion (an absence of contrast within the lumen of the vein in association with adjacent tumor).                                                                                                                                                                                                                                                                                                                                                                                                                                                                                                                                                                                                                                                                                       | NR       | NR         | NR        | NR     |                   |  |   |   |   |  |  |    |      |   |  |  |      |       |   |  |  |       |        |   |  |  |       |         |   |  |  |     |      |   |  |           |            |           |       |                   |  |   |    |   |  |  |    |             |  |  |  |      |                  |   |  |  |       |        |   |  |  |       |         |   |  |  |     |                              |   |  |     |      |    |     |
| Li et al, 2006 <sup>21</sup>       | 54         | SMA, CA, CHA, SMV, PV        | Degree and shape                 | Grade A = Fat plane or normal pancreatic tissue visible between tumor and vessel.<br>Grade B = Tumor surrounding of less than one-half of the circumference of the vessel.<br>Grade C = Tumor surrounding of more than one-half of the circumference of the vessel.<br>Grade D = Arterial embedment in tumor or venous occlusion.                                                                                                                                                                                                                                                                                                                                                                                                                                                                                                                                                                                                                                                                                                                                                                                                                                                        | 94.1     | 83.8       | 72.7      | 96.9   |                   |  |   |   |   |  |  |    |      |   |  |  |      |       |   |  |  |       |        |   |  |  |       |         |   |  |  |     |      |   |  |           |            |           |       |                   |  |   |    |   |  |  |    |             |  |  |  |      |                  |   |  |  |       |        |   |  |  |       |         |   |  |  |     |                              |   |  |     |      |    |     |

Measures of accuracy in the table (sensitivity, specificity, PPV and NPV) are in relation to the capability of the respective scoring system to predict tumor resection.

CA, celiac axis; CHA, common hepatic artery; NPV, negative predictive value; NR, not reported; PPV, positive predictive value; PV, portal vein; Sens, sensitivity; SMA, superior mesenteric artery; SMV, superior mesenteric vein; Spec, specificity; SV, splenic vein.
